# Supplementary material
Source: PubMed Central journal article supplement (PMC3567281)

## Supplemental Data

### Mutations in *GBA2* Cause Autosomal-Recessive

### Cerebellar Ataxia with Spasticity

Monia B. Hammer, Ghada Eleuch-Fayache, Lucia V. Schottlaender, Houda Nehdi, J. Raphael Gibbs, Sampath K. Arepalli, Sean B. Chong, Dena G. Hernandez, Anna Sailer, Guoxiang Liu, Pramod K. Mistry, Huaibin Cai, Ginamarie Shrader, Celeste Sassi, Yosr Bouhlal, Henry Houlden, Fayçal Hentati, Rim Amouri, and Andrew B. Singleton

**Figure S1.** Output of homozygosity mapper for families C, E and I across the whole genome. Data input comprised genotypes from the HumanOmniExpress12 array (~730,000 markers/sample). Red lines indicate contiguous stretches of homozygous genotypes identical by descent in the 7 affected individuals.

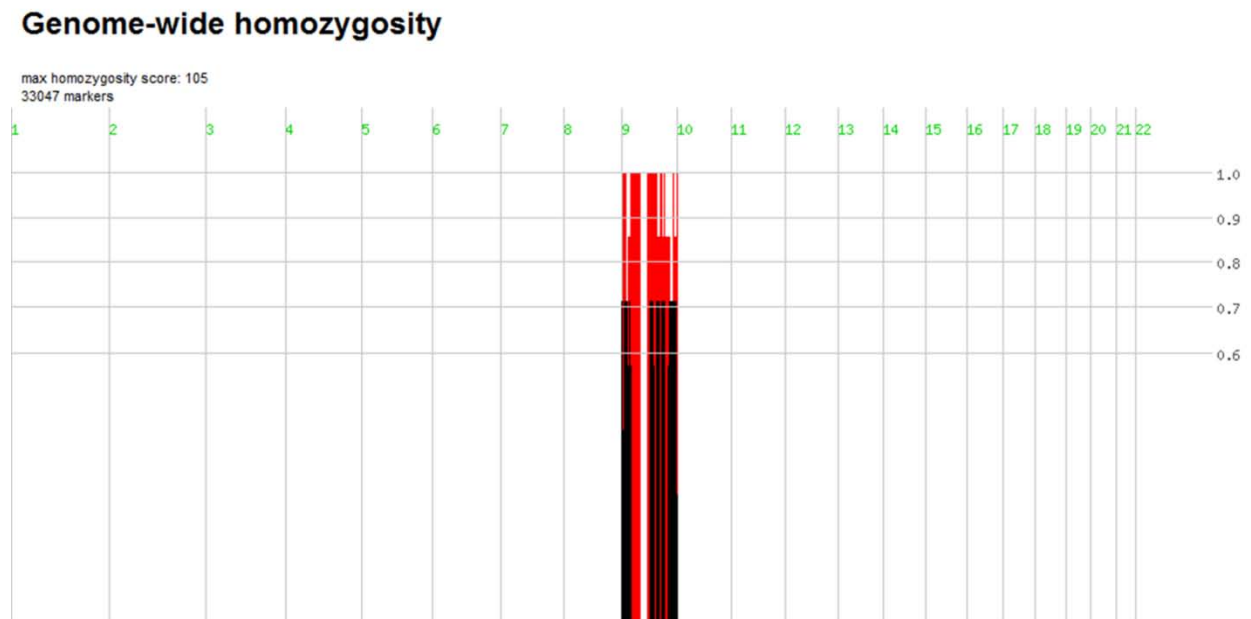

Supplement: mmc1.pdf [file mmc1.pdf]
